# Supplementary material for: Epithelial/mesenchymal heterogeneity of high‐grade serous ovarian carcinoma samples correlates with miRNA let‐7 levels and predicts tumor growth and metastasis
Source: PubMed Central journal article supplement (PMC7607177; doi:10.1002/1878-0261.12762), 2020-08-21

# Supplementary Figure S2

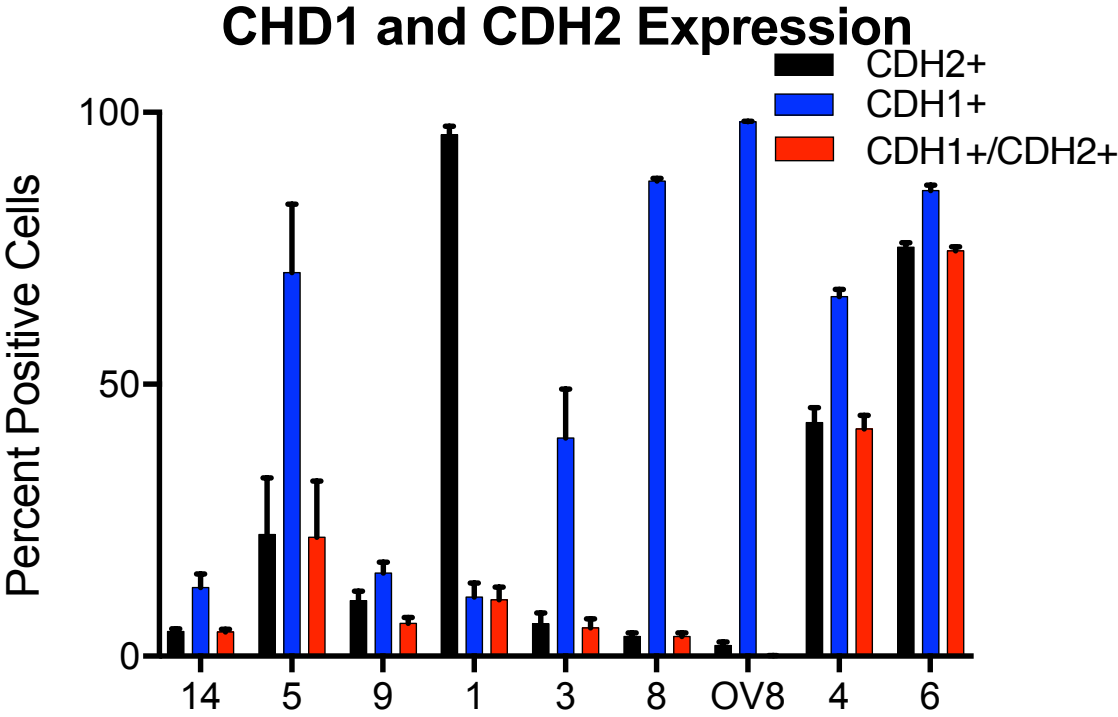

Supplement: MOL2-14-2796-s002.pdf [file MOL2-14-2796-s002.pdf]
